# Supplementary material for: Neuritogenic and Neuroprotective Effects of Polar Steroids from the Far East Starfishes Patiria pectinifera and Distolasterias nipon
Source: MDPI journal article supplement (doi:10.3390/md11051440), 2013-05-03
Supplement: s1 [file s1]

marinedrugs-11-01440-s001.mol
  corina  04151402543D 1   1.00000     0.00000 
CORINA 3.49 0023  12.04.2013
 48 51  0  0  0  0  0  0  0  0999 V2000
    0.3625    3.7179   -1.6891 C   0  0  0  0  0  0  0  0  0  0  0  0
    0.2288    2.2159   -1.9484 C   0  0  0  0  0  0  0  0  0  0  0  0
    0.8553    1.4410   -0.7873 C   0  0  0  0  0  0  0  0  0  0  0  0
    2.3357    1.8080   -0.6696 C   0  0  0  0  0  0  0  0  0  0  0  0
    2.4710    3.3101   -0.4108 C   0  0  0  0  0  0  0  0  0  0  0  0
    1.8429    4.0854   -1.5709 C   0  0  0  0  0  0  0  0  0  0  0  0
    2.9642    1.0307    0.4883 C   0  0  0  0  0  0  0  0  0  0  0  0
    4.4447    1.3984    0.6070 C   0  0  0  0  0  0  0  0  0  0  0  0
    4.5766    2.8988    0.8723 C   0  0  0  0  0  0  0  0  0  0  0  0
    3.9518    3.6747   -0.2975 C   0  0  0  0  0  0  0  0  0  0  0  0
    6.0391    3.2956    0.9443 C   0  0  0  0  0  0  0  0  0  0  0  0
    6.0825    4.8063    1.3005 C   0  0  0  0  0  0  0  0  0  0  0  0
    5.5790    5.5720    0.0927 C   0  0  0  0  0  0  0  0  0  0  0  0
    4.1062    5.1809   -0.1162 C   0  0  0  0  0  0  0  0  0  0  0  0
    6.8429    2.6825    2.0962 C   0  0  0  0  0  0  0  0  0  0  0  0
    8.0248    3.6764    2.2627 C   0  0  0  0  0  0  0  0  0  0  0  0
    7.5390    5.0323    1.6923 C   0  0  0  0  0  0  0  0  0  0  0  0
    7.6374    6.1228    2.7610 C   0  0  0  0  0  0  0  0  0  0  0  0
    9.1626    7.2380    4.3957 C   0  0  0  0  0  0  0  0  0  0  0  0
    9.0856    6.2370    3.2412 C   0  0  0  0  0  0  0  0  0  0  0  0
    9.8067    8.0818    7.1262 C   0  0  0  0  0  0  0  0  0  0  0  0
   10.7092    8.4427    5.9447 C   0  0  0  0  0  0  0  0  0  0  0  0
   10.6108    7.3522    4.8760 C   0  0  0  0  0  0  0  0  0  0  0  0
   10.2620    9.7802    5.3512 C   0  0  0  0  0  0  0  0  0  0  0  0
   11.0287    6.1031    5.4302 O   0  0  0  0  0  0  0  0  0  0  0  0
    7.1899    7.4602    2.1676 C   0  0  0  0  0  0  0  0  0  0  0  0
   12.4406    5.8886    5.3805 C   0  0  0  0  0  0  0  0  0  0  0  0
   12.8626    5.6583    4.0268 O   0  0  0  0  0  0  0  0  0  0  0  0
   12.8154    4.5950    6.1467 C   0  0  0  0  0  0  0  0  0  0  0  0
   14.1528    4.2184    5.4529 C   0  0  0  0  0  0  0  0  0  0  0  0
   13.9103    4.6818    4.0004 C   0  0  0  0  0  0  0  0  0  0  0  0
   15.1874    5.3061    3.4346 C   0  0  0  0  0  0  0  0  0  0  0  0
   13.0130    4.8590    7.5371 O   0  0  0  0  0  0  0  0  0  0  0  0
    5.1755    5.0808    2.5017 C   0  0  0  0  0  0  0  0  0  0  0  0
    3.9049    3.2347    2.0880 O   0  0  0  0  0  0  0  0  0  0  0  0
    1.7537    3.6704    0.8917 C   0  0  0  0  0  0  0  0  0  0  0  0
   -1.1539    1.8728   -2.0593 O   0  0  0  0  0  0  0  0  0  0  0  0
    7.3210    1.3828    1.7435 O   0  0  0  0  0  0  0  0  0  0  0  0
    2.8400   -0.3717    0.2433 O   0  0  0  0  0  0  0  0  0  0  0  0
    2.8479    1.5520   -1.5971 H   0  0  0  0  0  0  0  0  0  0  0  0
   15.2465    4.9284    6.0373 O   0  0  0  0  0  0  0  0  0  0  0  0
   15.8837    4.2330    7.1108 C   0  0  0  0  0  0  0  0  0  0  0  0
   14.9909    5.6260    2.0558 O   0  0  0  0  0  0  0  0  0  0  0  0
   16.2044    6.2562    1.3875 S   0  0  0  0  0  0  0  0  0  0  0  0
   15.7399    6.8390    0.1383 O   0  0  0  0  0  0  0  0  0  0  0  0
   16.7120    7.2646    2.3049 O   0  0  0  0  0  0  0  0  0  0  0  0
   17.1648    5.1861    1.1669 O   0  5  0  0  0  0  0  0  0  0  0  0
   22.1648   14.7802   12.5371 Na  0  3  0  0  0  0  0  0  0  0  0  0
  1  2  1  0      
  2  3  1  0      
  3  4  1  0      
  4  5  1  0      
  5  6  1  0      
  6  1  1  0      
  4  7  1  0      
  7  8  1  0      
  8  9  1  0      
  9 10  1  0      
 10  5  1  0      
  9 11  1  0      
 11 12  1  0      
 12 13  1  0      
 13 14  1  0      
 14 10  1  0      
 11 15  1  0      
 15 16  1  0      
 12 17  1  0      
 16 17  1  0      
 19 20  1  0      
 20 18  1  0      
 21 22  1  0      
 22 23  1  0      
 23 19  1  0      
 22 24  1  0      
 23 25  1  0      
 18 26  1  0      
 25 27  1  0      
 27 28  1  0      
 27 29  1  0      
 29 30  1  0      
 31 30  1  0      
 31 32  1  0      
 33 29  1  0      
 31 28  1  0      
 12 34  1  0      
  9 35  1  0      
  5 36  1  0      
  2 37  1  0      
 15 38  1  0      
  7 39  1  0      
  4 40  1  0      
 17 18  1  0      
 30 41  1  0      
 41 42  1  0      
 32 43  1  0      
 43 44  1  0      
 44 45  2  0      
 44 46  2  0      
 44 47  1  0      
M  CHG  2  47  -1  48   1
M  STY  1   1 SUP
M  SLB  1   1   1
M  SAL   1  2  41  42
M  SBL   1  1  45
M  SMT   1 OMe
M  SBV   1 45   -6.3358    8.6127
M  STY  1   2 SUP
M  SLB  1   2   2
M  SAL   2  6  43  44  45  46  47  48
M  SBL   2  1  47
M  SMT   2 OSO3-Na+
M  SBV   2 47   -7.1528    9.4431
M  END
$$$$
