# Supplementary material for: Neuritogenic and Neuroprotective Effects of Polar Steroids from the Far East Starfishes Patiria pectinifera and Distolasterias nipon
Source: MDPI journal article supplement (doi:10.3390/md11051440), 2013-05-03
Supplement: s2 [file s2]

marinedrugs-11-01440-s001.mol
  ChemDraw02251409182D

 48 51  0  0  0  0  0  0  0  0999 V2000
   -3.5496   -2.5042    0.0000 C   0  0  0  0  0  0  0  0  0  0  0  0
   -3.5496   -3.3292    0.0000 C   0  0  0  0  0  0  0  0  0  0  0  0
   -2.8351   -3.7417    0.0000 C   0  0  0  0  0  0  0  0  0  0  0  0
   -2.1207   -3.3292    0.0000 C   0  0  0  0  0  0  0  0  0  0  0  0
   -2.1207   -2.5042    0.0000 C   0  0  0  0  0  0  0  0  0  0  0  0
   -2.8351   -2.0917    0.0000 C   0  0  0  0  0  0  0  0  0  0  0  0
   -1.4062   -3.7417    0.0000 C   0  0  0  0  0  0  0  0  0  0  0  0
   -0.6917   -3.3292    0.0000 C   0  0  0  0  0  0  0  0  0  0  0  0
   -0.6917   -2.5042    0.0000 C   0  0  0  0  0  0  0  0  0  0  0  0
   -1.4062   -2.0917    0.0000 C   0  0  0  0  0  0  0  0  0  0  0  0
    0.0227   -2.0917    0.0000 C   0  0  0  0  0  0  0  0  0  0  0  0
    0.0227   -1.2667    0.0000 C   0  0  0  0  0  0  0  0  0  0  0  0
   -0.6917   -0.8542    0.0000 C   0  0  0  0  0  0  0  0  0  0  0  0
   -1.4062   -1.2667    0.0000 C   0  0  0  0  0  0  0  0  0  0  0  0
    1.2692   -2.0917    0.0000 C   0  0  0  0  0  0  0  0  0  0  0  0
    1.2692   -1.2254    0.0000 C   0  0  0  0  0  0  0  0  0  0  0  0
    0.6711   -0.9160    0.0000 C   0  0  0  0  0  0  0  0  0  0  0  0
    0.6917   -0.0498    0.0000 C   0  0  0  0  0  0  0  0  0  0  0  0
    2.1207   -0.0498    0.0000 C   0  0  0  0  0  0  0  0  0  0  0  0
    1.4062    0.3627    0.0000 C   0  0  0  0  0  0  0  0  0  0  0  0
    3.5496   -0.8748    0.0000 C   0  0  0  0  0  0  0  0  0  0  0  0
    3.5496   -0.0498    0.0000 C   0  0  0  0  0  0  0  0  0  0  0  0
    2.8351    0.3627    0.0000 C   0  0  0  0  0  0  0  0  0  0  0  0
    4.2641    0.3627    0.0000 C   0  0  0  0  0  0  0  0  0  0  0  0
    2.8351    1.1877    0.0000 O   0  0  0  0  0  0  0  0  0  0  0  0
   -0.0227    0.3627    0.0000 C   0  0  0  0  0  0  0  0  0  0  0  0
    2.0383    0.9742    0.0000 C   0  0  0  0  0  0  0  0  0  0  0  0
    2.4508    1.6887    0.0000 O   0  0  0  0  0  0  0  0  0  0  0  0
    1.2414    1.1877    0.0000 C   0  0  0  0  0  0  0  0  0  0  0  0
    1.2414    2.0127    0.0000 C   0  0  0  0  0  0  0  0  0  0  0  0
    1.9911    2.3633    0.0000 C   0  0  0  0  0  0  0  0  0  0  0  0
    1.1661    2.3633    0.0000 C   0  0  0  0  0  0  0  0  0  0  0  0
    0.6299    1.2908    0.0000 O   0  0  0  0  0  0  0  0  0  0  0  0
    0.0227   -0.4417    0.0000 C   0  0  0  0  0  0  0  0  0  0  0  0
   -0.6917   -1.6792    0.0000 O   0  0  0  0  0  0  0  0  0  0  0  0
   -2.1207   -1.6792    0.0000 C   0  0  0  0  0  0  0  0  0  0  0  0
   -4.2641   -3.7417    0.0000 O   0  0  0  0  0  0  0  0  0  0  0  0
    1.8526   -2.6750    0.0000 O   0  0  0  0  0  0  0  0  0  0  0  0
   -1.4062   -4.5667    0.0000 O   0  0  0  0  0  0  0  0  0  0  0  0
   -2.1207   -4.1542    0.0000 H   0  0  0  0  0  0  0  0  0  0  0  0
    2.0101    2.2190    0.0000 O   0  0  0  0  0  0  0  0  0  0  0  0
    2.7246    1.8065    0.0000 C   0  0  0  0  0  0  0  0  0  0  0  0
    1.1178    3.3999    0.0000 O   0  0  0  0  0  0  0  0  0  0  0  0
    0.5345    3.9833    0.0000 S   0  0  0  0  0  0  0  0  0  0  0  0
   -0.0489    3.3999    0.0000 O   0  0  0  0  0  0  0  0  0  0  0  0
    1.1178    4.5667    0.0000 O   0  0  0  0  0  0  0  0  0  0  0  0
   -0.0489    4.5667    0.0000 O   0  5  0  0  0  0  0  0  0  0  0  0
    0.9411    2.5749    0.0000 Na  0  3  0  0  0  0  0  0  0  0  0  0
  1  2  1  0      
  2  3  1  0      
  3  4  1  0      
  4  5  1  0      
  5  6  1  0      
  6  1  1  0      
  4  7  1  0      
  7  8  1  0      
  8  9  1  0      
  9 10  1  0      
 10  5  1  0      
  9 11  1  0      
 11 12  1  0      
 12 13  1  0      
 13 14  1  0      
 14 10  1  0      
 11 15  1  0      
 15 16  1  0      
 12 17  1  0      
 16 17  1  0      
 19 20  1  0      
 20 18  1  0      
 21 22  1  0      
 22 23  1  0      
 23 19  1  0      
 22 24  1  0      
 23 25  1  6      
 18 26  1  6      
 25 27  1  0      
 27 28  1  0      
 27 29  1  1      
 29 30  1  1      
 31 30  1  1      
 31 32  1  0      
 33 29  1  1      
 31 28  1  0      
 12 34  1  1      
  9 35  1  1      
  5 36  1  1      
  2 37  1  1      
 15 38  1  6      
  7 39  1  6      
  4 40  1  6      
 17 18  1  1      
 30 41  1  0      
 41 42  1  0      
 32 43  1  0      
 43 44  1  0      
 44 45  2  0      
 44 46  2  0      
 44 47  1  0      
M  CHG  2  47  -1  48   1
M  STY  1   1 SUP
M  SLB  1   1   1
M  SAL   1  2  41  42
M  SBL   1  1  45
M  SMT   1 OMe
M  SBV   1 45   -6.3358    8.6127
M  STY  1   2 SUP
M  SLB  1   2   2
M  SAL   2  6  43  44  45  46  47  48
M  SBL   2  1  47
M  SMT   2 OSO3-Na+
M  SBV   2 47   -7.1528    9.4431
M  END
