# Supplementary material for: Neuritogenic and Neuroprotective Effects of Polar Steroids from the Far East Starfishes Patiria pectinifera and Distolasterias nipon
Source: MDPI journal article supplement (doi:10.3390/md11051440), 2013-05-03
Supplement: s3 [file s3]

marinedrugs-11-01440-s002.mol
  corina  04151402543D 1   1.00000     0.00000 
CORINA 3.49 0023  12.04.2013
 36 39  0  0  0  0  0  0  0  0999 V2000
   -0.4488    3.0391    0.0961 C   0  0  0  0  0  0  0  0  0  0  0  0
   -0.9883    1.6116   -0.0144 C   0  0  0  0  0  0  0  0  0  0  0  0
   -0.5692    0.8119    1.2209 C   0  0  0  0  0  0  0  0  0  0  0  0
    0.9575    0.7741    1.3097 C   0  0  0  0  0  0  0  0  0  0  0  0
    1.4986    2.2013    1.4197 C   0  0  0  0  0  0  0  0  0  0  0  0
    1.0780    3.0019    0.1854 C   0  0  0  0  0  0  0  0  0  0  0  0
    1.3778   -0.0288    2.5421 C   0  0  0  0  0  0  0  0  0  0  0  0
    2.9048   -0.0657    2.6319 C   0  0  0  0  0  0  0  0  0  0  0  0
    3.4423    1.3613    2.7485 C   0  0  0  0  0  0  0  0  0  0  0  0
    3.0249    2.1607    1.5044 C   0  0  0  0  0  0  0  0  0  0  0  0
    4.9588    1.3525    2.7888 C   0  0  0  0  0  0  0  0  0  0  0  0
    5.4158    2.8223    2.9943 C   0  0  0  0  0  0  0  0  0  0  0  0
    5.1116    3.5754    1.7142 C   0  0  0  0  0  0  0  0  0  0  0  0
    3.5839    3.5791    1.5369 C   0  0  0  0  0  0  0  0  0  0  0  0
    5.5920    0.6589    3.9998 C   0  0  0  0  0  0  0  0  0  0  0  0
    7.0015    1.3072    4.0738 C   0  0  0  0  0  0  0  0  0  0  0  0
    6.8874    2.6824    3.3697 C   0  0  0  0  0  0  0  0  0  0  0  0
    7.2994    3.8034    4.3260 C   0  0  0  0  0  0  0  0  0  0  0  0
    9.1541    4.6849    5.7492 C   0  0  0  0  0  0  0  0  0  0  0  0
    8.7745    3.6400    4.6980 C   0  0  0  0  0  0  0  0  0  0  0  0
   11.0088    5.5663    7.1724 C   0  0  0  0  0  0  0  0  0  0  0  0
   10.6292    4.5214    6.1212 C   0  0  0  0  0  0  0  0  0  0  0  0
   12.4468    5.3246    7.6356 C   0  0  0  0  0  0  0  0  0  0  0  0
    7.0924    5.1573    3.6441 C   0  0  0  0  0  0  0  0  0  0  0  0
    4.6426    3.4465    4.1577 C   0  0  0  0  0  0  0  0  0  0  0  0
    2.9126    1.9821    3.9215 O   0  0  0  0  0  0  0  0  0  0  0  0
    0.9333    2.8661    2.6765 C   0  0  0  0  0  0  0  0  0  0  0  0
   -2.4144    1.6464   -0.0982 O   0  0  0  0  0  0  0  0  0  0  0  0
    5.6941   -0.7493    3.7798 O   0  0  0  0  0  0  0  0  0  0  0  0
    0.8746   -1.3621    2.4361 O   0  0  0  0  0  0  0  0  0  0  0  0
    1.3615    0.3008    0.4148 H   0  0  0  0  0  0  0  0  0  0  0  0
   10.8975    6.9657    6.5639 C   0  0  0  0  0  0  0  0  0  0  0  0
   12.7625    6.2255    8.6990 O   0  0  0  0  0  0  0  0  0  0  0  0
    7.3886    1.4852    5.4378 O   0  0  0  0  0  0  0  0  0  0  0  0
    3.4365   -0.6806    1.4566 O   0  0  0  0  0  0  0  0  0  0  0  0
   -1.0994    1.4335    2.3933 O   0  0  0  0  0  0  0  0  0  0  0  0
  1  2  1  0      
  2  3  1  0      
  3  4  1  0      
  4  5  1  0      
  5  6  1  0      
  6  1  1  0      
  4  7  1  0      
  7  8  1  0      
  8  9  1  0      
  9 10  1  0      
 10  5  1  0      
  9 11  1  0      
 11 12  1  0      
 12 13  1  0      
 13 14  1  0      
 14 10  1  0      
 11 15  1  0      
 15 16  1  0      
 12 17  1  0      
 16 17  1  0      
 19 20  1  0      
 20 18  1  0      
 21 22  1  0      
 22 19  1  0      
 21 23  1  0      
 18 24  1  0      
 12 25  1  0      
  9 26  1  0      
  5 27  1  0      
  2 28  1  0      
 15 29  1  0      
  7 30  1  0      
  4 31  1  0      
 17 18  1  0      
 21 32  1  0      
 23 33  1  0      
 16 34  1  0      
  8 35  1  0      
  3 36  1  0      
M  END
$$$$
