# Supplementary material for: Neuritogenic and Neuroprotective Effects of Polar Steroids from the Far East Starfishes Patiria pectinifera and Distolasterias nipon
Source: MDPI journal article supplement (doi:10.3390/md11051440), 2013-05-03
Supplement: s4 [file s4]

marinedrugs-11-01440-s002.mol
  ChemDraw02251409192D

 36 39  0  0  0  0  0  0  0  0999 V2000
   -3.9069   -0.4022    0.0000 C   0  0  0  0  0  0  0  0  0  0  0  0
   -3.9069   -1.2272    0.0000 C   0  0  0  0  0  0  0  0  0  0  0  0
   -3.1924   -1.6397    0.0000 C   0  0  0  0  0  0  0  0  0  0  0  0
   -2.4779   -1.2272    0.0000 C   0  0  0  0  0  0  0  0  0  0  0  0
   -2.4779   -0.4022    0.0000 C   0  0  0  0  0  0  0  0  0  0  0  0
   -3.1924    0.0103    0.0000 C   0  0  0  0  0  0  0  0  0  0  0  0
   -1.7634   -1.6397    0.0000 C   0  0  0  0  0  0  0  0  0  0  0  0
   -1.0490   -1.2272    0.0000 C   0  0  0  0  0  0  0  0  0  0  0  0
   -1.0490   -0.4022    0.0000 C   0  0  0  0  0  0  0  0  0  0  0  0
   -1.7634    0.0103    0.0000 C   0  0  0  0  0  0  0  0  0  0  0  0
   -0.3345    0.0103    0.0000 C   0  0  0  0  0  0  0  0  0  0  0  0
   -0.3345    0.8353    0.0000 C   0  0  0  0  0  0  0  0  0  0  0  0
   -1.0490    1.2478    0.0000 C   0  0  0  0  0  0  0  0  0  0  0  0
   -1.7634    0.8353    0.0000 C   0  0  0  0  0  0  0  0  0  0  0  0
    0.9120    0.0103    0.0000 C   0  0  0  0  0  0  0  0  0  0  0  0
    0.9120    0.8766    0.0000 C   0  0  0  0  0  0  0  0  0  0  0  0
    0.3139    1.1859    0.0000 C   0  0  0  0  0  0  0  0  0  0  0  0
    0.3345    2.0522    0.0000 C   0  0  0  0  0  0  0  0  0  0  0  0
    1.7634    2.0522    0.0000 C   0  0  0  0  0  0  0  0  0  0  0  0
    1.0490    2.4647    0.0000 C   0  0  0  0  0  0  0  0  0  0  0  0
    3.1924    2.0522    0.0000 C   0  0  0  0  0  0  0  0  0  0  0  0
    2.4779    2.4647    0.0000 C   0  0  0  0  0  0  0  0  0  0  0  0
    3.9069    2.4647    0.0000 C   0  0  0  0  0  0  0  0  0  0  0  0
   -0.3800    2.4647    0.0000 C   0  0  0  0  0  0  0  0  0  0  0  0
   -0.3345    1.6603    0.0000 C   0  0  0  0  0  0  0  0  0  0  0  0
   -1.0490    0.4228    0.0000 O   0  0  0  0  0  0  0  0  0  0  0  0
   -2.4779    0.4228    0.0000 C   0  0  0  0  0  0  0  0  0  0  0  0
   -4.6213   -1.6397    0.0000 O   0  0  0  0  0  0  0  0  0  0  0  0
    1.4954   -0.5731    0.0000 O   0  0  0  0  0  0  0  0  0  0  0  0
   -1.7634   -2.4647    0.0000 O   0  0  0  0  0  0  0  0  0  0  0  0
   -2.4779   -2.0522    0.0000 H   0  0  0  0  0  0  0  0  0  0  0  0
    3.1924    1.2272    0.0000 C   0  0  0  0  0  0  0  0  0  0  0  0
    4.6213    2.0522    0.0000 O   0  0  0  0  0  0  0  0  0  0  0  0
    1.6265    1.2891    0.0000 O   0  0  0  0  0  0  0  0  0  0  0  0
   -0.4656   -1.8106    0.0000 O   0  0  0  0  0  0  0  0  0  0  0  0
   -3.1924   -2.4647    0.0000 O   0  0  0  0  0  0  0  0  0  0  0  0
  1  2  1  0      
  2  3  1  0      
  3  4  1  0      
  4  5  1  0      
  5  6  1  0      
  6  1  1  0      
  4  7  1  0      
  7  8  1  0      
  8  9  1  0      
  9 10  1  0      
 10  5  1  0      
  9 11  1  0      
 11 12  1  0      
 12 13  1  0      
 13 14  1  0      
 14 10  1  0      
 11 15  1  0      
 15 16  1  0      
 12 17  1  0      
 16 17  1  0      
 19 20  1  0      
 20 18  1  0      
 21 22  1  0      
 22 19  1  0      
 21 23  1  0      
 18 24  1  6      
 12 25  1  1      
  9 26  1  1      
  5 27  1  1      
  2 28  1  1      
 15 29  1  6      
  7 30  1  6      
  4 31  1  6      
 17 18  1  1      
 21 32  1  1      
 23 33  1  0      
 16 34  1  1      
  8 35  1  6      
  3 36  1  1      
M  END
