# Supplementary material for: Neuritogenic and Neuroprotective Effects of Polar Steroids from the Far East Starfishes Patiria pectinifera and Distolasterias nipon
Source: MDPI journal article supplement (doi:10.3390/md11051440), 2013-05-03
Supplement: s5 [file s5]

marinedrugs-11-01440-s003.mol
  corina  04151402553D 1   1.00000     0.00000 
CORINA 3.49 0023  12.04.2013
 52 57  0  0  0  0  0  0  0  0999 V2000
    0.2816    3.2675   -2.0653 C   0  0  0  0  0  0  0  0  0  0  0  0
    0.4688    1.7799   -2.3705 C   0  0  0  0  0  0  0  0  0  0  0  0
    1.2697    1.1256   -1.2428 C   0  0  0  0  0  0  0  0  0  0  0  0
    2.6387    1.7994   -1.1328 C   0  0  0  0  0  0  0  0  0  0  0  0
    2.4531    3.2874   -0.8282 C   0  0  0  0  0  0  0  0  0  0  0  0
    1.6505    3.9417   -1.9548 C   0  0  0  0  0  0  0  0  0  0  0  0
    3.4420    1.1432   -0.0084 C   0  0  0  0  0  0  0  0  0  0  0  0
    4.8110    1.8177    0.1027 C   0  0  0  0  0  0  0  0  0  0  0  0
    4.6225    3.3032    0.4138 C   0  0  0  0  0  0  0  0  0  0  0  0
    3.8228    3.9591   -0.7226 C   0  0  0  0  0  0  0  0  0  0  0  0
    5.9667    4.0034    0.4794 C   0  0  0  0  0  0  0  0  0  0  0  0
    5.6914    5.4774    0.8827 C   0  0  0  0  0  0  0  0  0  0  0  0
    5.0116    6.1505   -0.2934 C   0  0  0  0  0  0  0  0  0  0  0  0
    3.6536    5.4574   -0.4956 C   0  0  0  0  0  0  0  0  0  0  0  0
    6.9058    3.5456    1.6006 C   0  0  0  0  0  0  0  0  0  0  0  0
    7.8495    4.7656    1.7833 C   0  0  0  0  0  0  0  0  0  0  0  0
    7.0727    6.0006    1.2626 C   0  0  0  0  0  0  0  0  0  0  0  0
    6.9553    7.0561    2.3640 C   0  0  0  0  0  0  0  0  0  0  0  0
    8.2363    8.4230    4.0172 C   0  0  0  0  0  0  0  0  0  0  0  0
    8.3541    7.4619    2.8326 C   0  0  0  0  0  0  0  0  0  0  0  0
    9.5177    9.8843    5.5872 C   0  0  0  0  0  0  0  0  0  0  0  0
    9.6351    8.8288    4.4858 C   0  0  0  0  0  0  0  0  0  0  0  0
    8.8654   11.1456    5.0175 C   0  0  0  0  0  0  0  0  0  0  0  0
    6.2242    8.2841    1.8177 C   0  0  0  0  0  0  0  0  0  0  0  0
    4.7702    5.5161    2.1038 C   0  0  0  0  0  0  0  0  0  0  0  0
    3.9182    3.4521    1.6482 O   0  0  0  0  0  0  0  0  0  0  0  0
    1.7007    3.4478    0.4944 C   0  0  0  0  0  0  0  0  0  0  0  0
   -0.8098    1.1502   -2.4742 O   0  0  0  0  0  0  0  0  0  0  0  0
    6.1733    3.2888    2.8004 O   0  0  0  0  0  0  0  0  0  0  0  0
    3.6173   -0.2455   -0.2962 O   0  0  0  0  0  0  0  0  0  0  0  0
    3.1757    1.6860   -2.0746 H   0  0  0  0  0  0  0  0  0  0  0  0
   -3.4795    1.8748   -5.6089 C   0  0  0  0  0  0  0  0  0  0  0  0
   -3.2651    0.4094   -5.2179 C   0  0  0  0  0  0  0  0  0  0  0  0
   -2.6573    0.3508   -3.8131 C   0  0  0  0  0  0  0  0  0  0  0  0
   -1.3538    1.1535   -3.7956 C   0  0  0  0  0  0  0  0  0  0  0  0
   -1.6189    2.4987   -4.1985 O   0  0  0  0  0  0  0  0  0  0  0  0
   -2.1442    2.6186   -5.5221 C   0  0  0  0  0  0  0  0  0  0  0  0
   -3.9787    1.9442   -6.9461 O   0  0  0  0  0  0  0  0  0  0  0  0
   -4.5191   -0.2757   -5.2252 O   0  0  0  0  0  0  0  0  0  0  0  0
   -3.5754    0.9105   -2.8719 O   0  0  0  0  0  0  0  0  0  0  0  0
    8.6585    9.3369    6.7287 C   0  0  0  0  0  0  0  0  0  0  0  0
   10.3179    7.6819    4.9960 O   0  0  0  0  0  0  0  0  0  0  0  0
   14.2505    6.5866    4.0942 C   0  0  0  0  0  0  0  0  0  0  0  0
   13.8963    6.7026    5.5800 C   0  0  0  0  0  0  0  0  0  0  0  0
   12.3736    6.6470    5.7364 C   0  0  0  0  0  0  0  0  0  0  0  0
   11.7414    7.7623    4.8996 C   0  0  0  0  0  0  0  0  0  0  0  0
   12.1357    7.6133    3.5341 O   0  0  0  0  0  0  0  0  0  0  0  0
   13.5458    7.7041    3.3208 C   0  0  0  0  0  0  0  0  0  0  0  0
   13.9050    8.6715    3.6719 H   0  0  0  0  0  0  0  0  0  0  0  0
   15.6646    6.7100    3.9293 O   0  0  0  0  0  0  0  0  0  0  0  0
   14.4906    5.6201    6.2990 O   0  0  0  0  0  0  0  0  0  0  0  0
   11.8930    5.3796    5.2840 O   0  0  0  0  0  0  0  0  0  0  0  0
  1  2  1  0      
  2  3  1  0      
  3  4  1  0      
  4  5  1  0      
  5  6  1  0      
  6  1  1  0      
  4  7  1  0      
  7  8  1  0      
  8  9  1  0      
  9 10  1  0      
 10  5  1  0      
  9 11  1  0      
 11 12  1  0      
 12 13  1  0      
 13 14  1  0      
 14 10  1  0      
 11 15  1  0      
 15 16  1  0      
 12 17  1  0      
 16 17  1  0      
 19 20  1  0      
 20 18  1  0      
 21 22  1  0      
 22 19  1  0      
 21 23  1  0      
 18 24  1  0      
 12 25  1  0      
  9 26  1  0      
  5 27  1  0      
  2 28  1  0      
  7 30  1  0      
  4 31  1  0      
 17 18  1  0      
 35 36  1  0      
 36 37  1  0      
 37 32  1  0      
 28 35  1  0      
 15 29  1  0      
 35 34  1  0      
 34 33  1  0      
 32 33  1  0      
 32 38  1  0      
 33 39  1  0      
 34 40  1  0      
 21 41  1  0      
 22 42  1  0      
 46 47  1  0      
 47 48  1  0      
 48 43  1  0      
 46 42  1  0      
 46 45  1  0      
 45 44  1  0      
 43 44  1  0      
 48 49  1  0      
 43 50  1  0      
 44 51  1  0      
 45 52  1  0      
M  END
$$$$
