# Supplementary material for: Neuritogenic and Neuroprotective Effects of Polar Steroids from the Far East Starfishes Patiria pectinifera and Distolasterias nipon
Source: MDPI journal article supplement (doi:10.3390/md11051440), 2013-05-03
Supplement: s6 [file s6]

marinedrugs-11-01440-s003.mol
  ChemDraw02251409212D

 52 57  0  0  0  0  0  0  0  0999 V2000
   -1.8441   -1.3465    0.0000 C   0  0  0  0  0  0  0  0  0  0  0  0
   -1.8441   -2.1715    0.0000 C   0  0  0  0  0  0  0  0  0  0  0  0
   -1.1296   -2.5840    0.0000 C   0  0  0  0  0  0  0  0  0  0  0  0
   -0.4151   -2.1715    0.0000 C   0  0  0  0  0  0  0  0  0  0  0  0
   -0.4151   -1.3465    0.0000 C   0  0  0  0  0  0  0  0  0  0  0  0
   -1.1296   -0.9340    0.0000 C   0  0  0  0  0  0  0  0  0  0  0  0
    0.2993   -2.5840    0.0000 C   0  0  0  0  0  0  0  0  0  0  0  0
    1.0138   -2.1715    0.0000 C   0  0  0  0  0  0  0  0  0  0  0  0
    1.0138   -1.3465    0.0000 C   0  0  0  0  0  0  0  0  0  0  0  0
    0.2993   -0.9340    0.0000 C   0  0  0  0  0  0  0  0  0  0  0  0
    1.7283   -0.9340    0.0000 C   0  0  0  0  0  0  0  0  0  0  0  0
    1.7283   -0.1090    0.0000 C   0  0  0  0  0  0  0  0  0  0  0  0
    1.0138    0.3035    0.0000 C   0  0  0  0  0  0  0  0  0  0  0  0
    0.2993   -0.1090    0.0000 C   0  0  0  0  0  0  0  0  0  0  0  0
    2.9748   -0.9340    0.0000 C   0  0  0  0  0  0  0  0  0  0  0  0
    2.9748   -0.0677    0.0000 C   0  0  0  0  0  0  0  0  0  0  0  0
    2.3766    0.2416    0.0000 C   0  0  0  0  0  0  0  0  0  0  0  0
    2.3973    1.1079    0.0000 C   0  0  0  0  0  0  0  0  0  0  0  0
    3.8262    1.1079    0.0000 C   0  0  0  0  0  0  0  0  0  0  0  0
    3.1117    1.5204    0.0000 C   0  0  0  0  0  0  0  0  0  0  0  0
    5.2551    1.1079    0.0000 C   0  0  0  0  0  0  0  0  0  0  0  0
    4.5407    1.5204    0.0000 C   0  0  0  0  0  0  0  0  0  0  0  0
    5.9696    1.5204    0.0000 C   0  0  0  0  0  0  0  0  0  0  0  0
    1.6828    1.5204    0.0000 C   0  0  0  0  0  0  0  0  0  0  0  0
    1.7283    0.7160    0.0000 C   0  0  0  0  0  0  0  0  0  0  0  0
    1.0138   -0.5215    0.0000 O   0  0  0  0  0  0  0  0  0  0  0  0
   -0.4151   -0.5215    0.0000 C   0  0  0  0  0  0  0  0  0  0  0  0
   -2.5586   -2.5840    0.0000 O   0  0  0  0  0  0  0  0  0  0  0  0
    3.6892   -1.3465    0.0000 O   0  0  0  0  0  0  0  0  0  0  0  0
    0.2993   -3.4090    0.0000 O   0  0  0  0  0  0  0  0  0  0  0  0
   -0.4151   -2.9965    0.0000 H   0  0  0  0  0  0  0  0  0  0  0  0
   -5.2551   -1.9433    0.0000 C   0  0  0  0  0  0  0  0  0  0  0  0
   -4.8426   -2.6578    0.0000 C   0  0  0  0  0  0  0  0  0  0  0  0
   -4.0446   -2.4487    0.0000 C   0  0  0  0  0  0  0  0  0  0  0  0
   -3.2513   -2.6578    0.0000 C   0  0  0  0  0  0  0  0  0  0  0  0
   -3.6638   -1.9433    0.0000 O   0  0  0  0  0  0  0  0  0  0  0  0
   -4.4619   -2.1524    0.0000 C   0  0  0  0  0  0  0  0  0  0  0  0
   -5.9696   -2.3558    0.0000 O   0  0  0  0  0  0  0  0  0  0  0  0
   -5.6676   -2.6578    0.0000 O   0  0  0  0  0  0  0  0  0  0  0  0
   -3.4612   -3.0321    0.0000 O   0  0  0  0  0  0  0  0  0  0  0  0
    5.2551    0.2829    0.0000 C   0  0  0  0  0  0  0  0  0  0  0  0
    4.5407    2.3454    0.0000 O   0  0  0  0  0  0  0  0  0  0  0  0
    1.9842    2.9035    0.0000 C   0  0  0  0  0  0  0  0  0  0  0  0
    2.3967    2.1891    0.0000 C   0  0  0  0  0  0  0  0  0  0  0  0
    3.1948    2.3982    0.0000 C   0  0  0  0  0  0  0  0  0  0  0  0
    3.9881    2.1891    0.0000 C   0  0  0  0  0  0  0  0  0  0  0  0
    3.5756    2.9035    0.0000 O   0  0  0  0  0  0  0  0  0  0  0  0
    2.7775    2.6945    0.0000 C   0  0  0  0  0  0  0  0  0  0  0  0
    2.3650    3.4090    0.0000 H   0  0  0  0  0  0  0  0  0  0  0  0
    1.2698    2.4910    0.0000 O   0  0  0  0  0  0  0  0  0  0  0  0
    1.5717    2.1891    0.0000 O   0  0  0  0  0  0  0  0  0  0  0  0
    3.9093    1.9857    0.0000 O   0  0  0  0  0  0  0  0  0  0  0  0
  1  2  1  0      
  2  3  1  0      
  3  4  1  0      
  4  5  1  0      
  5  6  1  0      
  6  1  1  0      
  4  7  1  0      
  7  8  1  0      
  8  9  1  0      
  9 10  1  0      
 10  5  1  0      
  9 11  1  0      
 11 12  1  0      
 12 13  1  0      
 13 14  1  0      
 14 10  1  0      
 11 15  1  0      
 15 16  1  0      
 12 17  1  0      
 16 17  1  0      
 19 20  1  0      
 20 18  1  0      
 21 22  1  0      
 22 19  1  0      
 21 23  1  0      
 18 24  1  6      
 12 25  1  1      
  9 26  1  1      
  5 27  1  1      
  2 28  1  1      
  7 30  1  6      
  4 31  1  6      
 17 18  1  1      
 35 36  1  0      
 36 37  1  0      
 37 32  1  0      
 28 35  1  0      
 15 29  1  1      
 35 34  1  1      
 34 33  1  1      
 32 33  1  1      
 32 38  1  0      
 33 39  1  0      
 34 40  1  0      
 21 41  1  0      
 22 42  1  6      
 46 47  1  0      
 47 48  1  0      
 48 43  1  0      
 46 42  1  0      
 46 45  1  1      
 45 44  1  1      
 43 44  1  1      
 48 49  1  0      
 43 50  1  0      
 44 51  1  0      
 45 52  1  0      
M  END
